# Supplementary material
Source: PubMed Central journal article supplement (PMC3501657)
Supplement: NIHMS391632-supplement-Supplemental.pdf [file NIHMS391632-supplement-Supplemental.pdf]

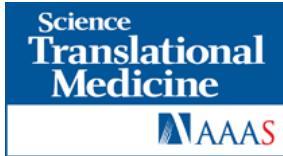

## Supplementary Materials for

### **MF59 Adjuvant Enhances Diversity and Affinity of Antibody-Mediated Immune Response to Pandemic Influenza Vaccines**

Surender Khurana, Nitin Verma, Jonathan W. Yewdell, Anne Katrin Hilbert, Flora Castellino, Maria Lattanzi, Giuseppe Del Giudice, Rino Rappuoli, Hana Golding\*

\*To whom correspondence should be addressed. E-mail: [hana.golding@fda.hhs.gov](mailto:hana.golding@fda.hhs.gov)

Published 1 June 2011, *Sci. Transl. Med.* **3**, 85ra48 (2011)  
DOI: 10.1126/scitranslmed.3002336

#### **The PDF file includes:**

Fig. S1. The A/H1N1/California/07/2009 HA protein sequence.

Table S1. Frequency of selected phage clones with SOIV-H1N1–vaccinated individuals using H1N1 GFPDL in different age groups.

# Supplementary Figure 1

## PROTEIN SEQUENCE OF H1N1- A/California/07/2009

Protein Range: 1 to 566

```
      10      20      30      40      50      60      70      80      90     100
MKAILVLLYTFATANADTLICIGYHANNSTDTVDTVLEKNVTVTHSVNLLLEDKHNGKLCCKLRGVAPLHLGKCNIAGWILGNPECESLSTASSWSYIVETP
                                     HA1
----->
      110     120     130     140     150     160     170     180     190     200
SSDNGTCYPGDFIDYEELREQLSSVSSFERFEIFPKTSSWPNHDSNKGVTAACPHAGAKSFYKNLIWLVKKGNSYPKLSKSYINDKGKEVLVLWGIHHP
                                     HA1
----->
      210     220     230     240     250     260     270     280     290     300
TSADQQSLYQNADAYVFGSSRYSKKFKPEIAIRPKVRDQEGRMNYWTLVPEGDKITFEATGNLVVPRYAFAMERNAGSGIIISDTPVHDCNTTCQTPK
                                     HA1
----->
      310     320     330     340     350     360     370     380     390     400
GAINSTLSPFQNIHPITIGKCPKYVKSTKLRRLATGLRNIPSIQSRGLFGAIAGFIEGGWTGMVDGWYGYHHQNEQGSYAADLKSTQNAIDEITNKVNSVI
      HA1                                     HA2
----->
      410     420     430     440     450     460     470     480     490     500
EKMNTQFTAVGKEFNHLEKRIENLNKKVDDGFLDIWTYNAELLVLENERLTDYHDSNVKNLYEKVRSQLKNNAKEIGNGCFEFYHKCDNTCMESVKNGT
                                     HA2
----->
      510     520     530     540     550     560
YDYPKYSEEAKLNREEIDGVKLESTRIYQILAIYSTVASSLVLVVSLGAI SFWMCNSGSLQCRICI
                                     HA2
----->
```

Supplementary Table- 1

## FREQUENCY OF SELECTED PHAGE CLONES WITH SOIV-H1N1-VACCINATED INDIVIDUALS USING H1N1 GFPDL IN DIFFERENT AGE GROUPS

| Seq Region  | Peptide Sequence                                                                                                                                                                       | PEDIATRICS (12-35 months) |             |               | YOUNG (3-8 years) |             |               | ADULTS (18-60 years) |             |               |
|-------------|----------------------------------------------------------------------------------------------------------------------------------------------------------------------------------------|---------------------------|-------------|---------------|-------------------|-------------|---------------|----------------------|-------------|---------------|
|             |                                                                                                                                                                                        | Pre-Vaccine               | No-adjutant | MF59-Adjuvant | Pre-Vaccine       | No-adjutant | MF59-Adjuvant | Pre-Vaccine          | No-adjutant | MF59-Adjuvant |
| HA1         |                                                                                                                                                                                        |                           |             |               |                   |             |               |                      |             |               |
| H1-HA-1-33  | MKAILVLLYTFATANADTLCIGYHANNSTDTV                                                                                                                                                       |                           | 1           | 2             |                   | 1           |               |                      |             | 2             |
| H1-HA-1-47  | MKAILVLLYTFATANADTLCIGYHANNSTDTVDTVLEKN<br>VTVTHSV                                                                                                                                     |                           | 1           | 1             | 1                 | 10          | 19            | 2                    | 57          | 111           |
| H1-HA-1-52  | MKAILVLLYTFATANADTLCIGYHANNSTDTVDTVLEKN<br>VTVTHSVNLLLED                                                                                                                               | 1                         | 2           | 2             | 1                 | 9           | 21            | 2                    | 73          | 155           |
| H1-HA-1-56  | MKAILVLLYTFATANADTLCIGYHANNSTDTVDTVLEKN<br>VTVTHSVNLLLEDKHNG                                                                                                                           |                           | 1           | 3             |                   | 7           | 15            |                      | 1           | 3             |
| H1-HA-1-68  | MKAILVLLYTFATANADTLCIGYHANNSTDTVDTVLEKN<br>VTVTHSVNLLLEDKHNGKLCCKLRGVAPLH                                                                                                              |                           | 1           | 3             |                   | 4           | 5             | 2                    | 8           | 69            |
| H1-HA-1-77  | MKAILVLLYTFATANADTLCIGYHANNSTDTVDTVLEKN<br>VTVTHSVNLLLEDKHNGKLCCKLRGVAPLHLGKCNIAAGW                                                                                                    |                           | 1           |               |                   | 3           | 2             |                      | 2           | 4             |
| H1-HA-1-84  | MKAILVLLYTFATANADTLCIGYHANNSTDTVDTVLEKN<br>VTVTHSVNLLLEDKHNGKLCCKLRGVAPLHLGKCNIAAGWIL<br>GNPEC                                                                                         |                           | 4           | 5             |                   | 1           | 8             |                      | 1           | 1             |
| H1-HA-1-92  | MKAILVLLYTFATANADTLCIGYHANNSTDTVDTVLEKN<br>VTVTHSVNLLLEDKHNGKLCCKLRGVAPLHLGKCNIAAGWIL<br>GNPECESLSTASS                                                                                 |                           | 1           | 2             |                   | 2           | 3             | 2                    | 1           |               |
| H1-HA-1-100 | MKAILVLLYTFATANADTLCIGYHANNSTDTVDTVLEKN<br>VTVTHSVNLLLEDKHNGKLCCKLRGVAPLHLGKCNIAAGWIL<br>GNPECESLSTASSWSYIVETP                                                                         |                           | 1           | 2             |                   |             |               |                      |             |               |
| H1-HA-1-116 | MKAILVLLYTFATANADTLCIGYHANNSTDTVDTVLEKN<br>VTVTHSVNLLLEDKHNGKLCCKLRGVAPLHLGKCNIAAGWIL<br>GNPECESLSTASSWSYIVETPSSDNGTCYPGDFIDYE                                                         |                           |             | 1             |                   | 1           | 1             |                      | 1           | 2             |
| H1-HA-1-132 | MKAILVLLYTFATANADTLCIGYHANNSTDTVDTVLEKN<br>VTVTHSVNLLLEDKHNGKLCCKLRGVAPLHLGKCNIAAGWIL<br>GNPECESLSTASSWSYIVETPSSDNGTCYPGDFIDYEEL<br>REQLSSVSSFERFE                                     |                           |             | 1             |                   |             | 1             |                      | 2           | 7             |
| H1-HA-1-145 | MKAILVLLYTFATANADTLCIGYHANNSTDTVDTVLEKN<br>VTVTHSVNLLLEDKHNGKLCCKLRGVAPLHLGKCNIAAGWIL<br>GNPECESLSTASSWSYIVETPSSDNGTCYPGDFIDYEEL<br>REQLSSVSSFERFEIFPKTSSWPNHDS                        |                           |             | 1             |                   |             | 3             |                      | 4           | 3             |
| H1-HA-1-163 | MKAILVLLYTFATANADTLCIGYHANNSTDTVDTVLEKN<br>VTVTHSVNLLLEDKHNGKLCCKLRGVAPLHLGKCNIAAGWIL<br>GNPECESLSTASSWSYIVETPSSDNGTCYPGDFIDYEEL<br>REQLSSVSSFERFEIFPKTSSWPNHDSNKGVTAAACPHA<br>GAKSFYK |                           | 6           | 11            |                   | 1           | 8             |                      |             | 4             |

|              |                                                                                                                                                                                                                                                                                                  |   |  |    |  |   |    |     |      |
|--------------|--------------------------------------------------------------------------------------------------------------------------------------------------------------------------------------------------------------------------------------------------------------------------------------------------|---|--|----|--|---|----|-----|------|
| H1-HA-1-183  | MKAILVLLYTFATANADTLCIGYHANNSTDTVDTVLEKN<br>VTVTHSVNLLLEDKHNGKLCCKLRGVAPLHLGKCNIAGWIL<br>GNPECESLSTASSWSYIVETPSSDNGTCYPGDFIDYEEL<br>REQLSSVSSFERFEIFPKTSSWPNHDSNKGVTAAACPHA<br>GAKSFYKNLIWLVKKGNSYPKLSKSYI                                                                                        |   |  | 3  |  | 2 | 2  |     |      |
| H1-HA-1-191  | MKAILVLLYTFATANADTLCIGYHANNSTDTVDTVLEKN<br>VTVTHSVNLLLEDKHNGKLCCKLRGVAPLHLGKCNIAGWIL<br>GNPECESLSTASSWSYIVETPSSDNGTCYPGDFIDYEEL<br>REQLSSVSSFERFEIFPKTSSWPNHDSNKGVTAAACPHA<br>GAKSFYKNLIWLVKKGNSYPKLSKSYINDKGKEVL                                                                                | 1 |  | 5  |  |   | 3  |     | 7    |
| H1-HA-1-204  | MKAILVLLYTFATANADTLCIGYHANNSTDTVDTVLEKN<br>VTVTHSVNLLLEDKHNGKLCCKLRGVAPLHLGKCNIAGWIL<br>GNPECESLSTASSWSYIVETPSSDNGTCYPGDFIDYEEL<br>REQLSSVSSFERFEIFPKTSSWPNHDSNKGVTAAACPHA<br>GAKSFYKNLIWLVKKGNSYPKLSKSYINDKGKEVLVLWG<br>IHPSTAD                                                                 | 1 |  | 2  |  | 1 | 2  |     | 2 3  |
| H1-HA-1-218  | MKAILVLLYTFATANADTLCIGYHANNSTDTVDTVLEKN<br>VTVTHSVNLLLEDKHNGKLCCKLRGVAPLHLGKCNIAGWIL<br>GNPECESLSTASSWSYIVETPSSDNGTCYPGDFIDYEEL<br>REQLSSVSSFERFEIFPKTSSWPNHDSNKGVTAAACPHA<br>GAKSFYKNLIWLVKKGNSYPKLSKSYINDKGKEVLVLWG<br>IHPSTADQQSLYQNADTYV                                                     | 5 |  | 4  |  | 4 | 5  |     | 2 3  |
| H1-HA-1-267  | MKAILVLLYTFATANADTLCIGYHANNSTDTVDTVLEKN<br>VTVTHSVNLLLEDKHNGKLCCKLRGVAPLHLGKCNIAGWIL<br>GNPECESLSTASSWSYIVETPSSDNGTCYPGDFIDYEEL<br>REQLSSVSSFERFEIFPKTSSWPNHDSNKGVTAAACPHA<br>GAKSFYKNLIWLVKKGNSYPKLSKSYINDKGKEVLVLWG<br>IHPSTADQQSLYQNADTYVFGSSRYSKFKPEIAIR<br>PKVRDQEGRMNYYWTLVEPGDKITFEATGNLV |   |  | 3  |  | 8 |    | 2 7 | 3 5  |
| H1-HA-24-144 | YHANNSTDTVDTVLEKNVTVTHSVNLLLEDKHNGKLCCKL<br>RGVAPLHLGKCNIAGWILGNPECESLSTASSWSYIVETP<br>SSDNGTCYPGDFIDYEELREQLSSVSSFERFEIFPKTSS<br>WPNHD                                                                                                                                                          |   |  |    |  |   |    |     | 1 1  |
| H1-HA-29-84  | STDTVDTVLEKNVTVTHSVNLLLEDKHNGKLCCKLRGVAPL<br>HLGKCNIAGWILGNPEC                                                                                                                                                                                                                                   | 1 |  | 2  |  | 4 | 2  |     |      |
| H1-HA-31-96  | DTVDTVLEKNVTVTHSVNLLLEDKHNGKLCCKLRGVAPLHL<br>GKCNIAGWILGNPECESLSTASSWSYI                                                                                                                                                                                                                         | 2 |  | 9  |  | 3 | 10 |     | 9 18 |
| H1-HA-34-132 | DTVLEKNVTVTHSVNLLLEDKHNGKLCCKLRGVAPLHLGK<br>CNIAGWILGNPECESLSTASSWSYIVETPSSDNGTCYPG<br>DFIDYEELREQLSSVSSFERFE                                                                                                                                                                                    |   |  | 3  |  |   |    |     | 1 2  |
| H1-HA-44-188 | THSVNLLLEDKHNGKLCCKLRGVAPLHLGKCNIAGWILGNP<br>ECESLSTASSWSYIVETPSSDNGTCYPGDFIDYEELREQ<br>LSSVSSFERFEIFPKTSSWPNHDSNKGVTAAACPHAGAK<br>SFYKNLIWLVKKGNSYPKLSKSYINDKGK                                                                                                                                 |   |  | 11 |  |   | 2  |     | 3    |

|               |                                                                                                                                                                                                                                                        |    |    |    |    |    |     |
|---------------|--------------------------------------------------------------------------------------------------------------------------------------------------------------------------------------------------------------------------------------------------------|----|----|----|----|----|-----|
| H1-HA-44-224  | THSVNLLEDKHNGKLCCKLRGVAPLHLGKCNIAGWILGNP<br>ECESLSTASSWSYIVETPSSDNGTCYPGDFIDYEELREQ<br>LSSVSSFERFEIFPKTSSWPNHDSNKGVTAAACPHAGAK<br>SFYKNLIWLKKGNSYPKLSKSYINDKGKEVLVLWGIHH<br>PSTSADQQSLYQNADTYVFGSSRYS                                                  | 1  | 4  | 2  | 8  | 2  | 19  |
| H1-HA-44-270  | THSVNLLEDKHNGKLCCKLRGVAPLHLGKCNIAGWILGNP<br>ECESLSTASSWSYIVETPSSDNGTCYPGDFIDYEELREQ<br>LSSVSSFERFEIFPKTSSWPNHDSNKGVTAAACPHAGAK<br>SFYKNLIWLKKGNSYPKLSKSYINDKGKEVLVLWGIHH<br>PSTSADQQSLYQNADTYVFGSSRYSKKFKPEIAIRPKV<br>RDQEGRMNYYWTLVEPGDKITFEATGNNVPRY | 17 | 31 | 9  | 53 | 5  | 62  |
| H1-HA-75-165  | AGWILGNPECESLSTASSWSYIVETPSSDNGTCYPGDFI<br>DYEELREQSSVSSFERFEIFPKTSSWPNHDSNKGVT<br>ACPHAGAKSFYKNL                                                                                                                                                      |    | 1  | 1  | 9  | 6  | 151 |
| H1-HA-88-135  | STASSWSYIVETPSSDNGTCYPGDFIDYEELREQSSVS<br>SFERFEIFP                                                                                                                                                                                                    | 3  | 8  |    |    | 2  | 79  |
| H1-HA-95-226  | YIVETPSSDNGTCYPGDFIDYEELREQSSVSSFERFEIF<br>PKTSSWPNHDSNKGVTAAACPHAGAKSFYKNLIWLKKG<br>NSYPKLSKSYINDKGKEVLVLWGIHHPSTSADQQSLYQN<br>ADTYVFGSSRYSKK                                                                                                         | 7  | 23 | 1  | 15 | 3  | 26  |
| H1-HA-107-218 | CYPGDFIDYEELREQSSVSSFERFEIFPKTSSWPNHDS<br>NKGVTAAACPHAGAKSFYKNLIWLKKGNSYPKLSKSYIN<br>DKGKEVLVLWGIHHPSTSADQQSLYQNADTYVVFV                                                                                                                               | 11 | 16 | 6  | 22 | 12 | 67  |
| H1-HA-108-144 | YPGDFIDYEELREQSSVSSFERFEIFPKTSSWPNHDS                                                                                                                                                                                                                  | 5  | 19 |    | 29 | 2  | 212 |
| H1-HA-109-296 | PGDFIDYEELREQSSVSSFERFEIFPKTSSWPNHDSNK<br>GVTAAACPHAGAKSFYKNLIWLKKGNSYPKLSKSYINDK<br>GKEVLVLWGIHHPSTSADQQSLYQNADTYVFGSSRYS<br>KKFKPEIAIRPKVRDQEGRMNYYWTLVEPGDKITFEATG<br>NLVPRYAFAMERNAGSGIIISDTPVHDCNTTC                                              | 1  | 17 | 1  | 3  |    | 7   |
| H1-HA-120-175 | EQLSSVSSFERFEIFPKTSSWPNHDSNKGVTAAACPHAG<br>AKSFYKNLIWLKKGNSY                                                                                                                                                                                           | 4  | 10 | 5  | 37 | 17 | 169 |
| H1-HA-124-221 | SVSSFERFEIFPKTSSWPNHDSNKGVTAAACPHAGAKSF<br>YKNLIWLKKGNSYPKLSKSYINDKGKEVLVLWGIHHP<br>TSADQQSLYQNADTYVFGSS                                                                                                                                               | 3  | 6  | 1  | 15 | 3  | 24  |
| H1-HA-127-268 | SFERFEIFPKTSSWPNHDSNKGVTAAACPHAGAKSFYKN<br>LIWLKKGNSYPKLSKSYINDKGKEVLVLWGIHHPSTSA<br>DQQSLYQNADTYVFGSSRYSKKFKPEIAIRPKVRDQ<br>EGRMNYYWTLVEPGDKITFEATGNLVVP                                                                                              | 29 | 53 | 11 | 32 | 1  | 3   |
| H1-HA-129-219 | ERFEIFPKTSSWPNHDSNKGVTAAACPHAGAKSFYKNLI<br>WLKKGNSYPKLSKSYINDKGKEVLVLWGIHHPSTSA<br>DQQSLYQNADTYVFG                                                                                                                                                     | 13 | 20 | 1  | 9  | 2  | 13  |
| H1-HA-141-248 | PNHDSNKGVTAAACPHAGAKSFYKNLIWLKKGNSYPKL<br>SKSYINDKGKEVLVLWGIHHPSTSA<br>DQQSLYQNADTYVFGSSRYSKKFKPEIAIRPKVRDQEGRMNYYW                                                                                                                                    |    | 9  |    | 7  | 2  | 11  |
| H1-HA-146-289 | NKGVTAACPHAGAKSFYKNLIWLKKGNSYPKLSKSYIN<br>DKGKEVLVLWGIHHPSTSA<br>DQQSLYQNADTYVFGSSRYSKKFKPEIAIRPKVRDQEGRMNYYWTLVEPGDKITFEA<br>TGNLVPRYAFAMERNAGSGIIISDTPV                                                                                              | 5  | 13 |    | 17 |    | 37  |

|               |                                                                                                                                                                                                            |    |    |  |   |    |  |    |     |
|---------------|------------------------------------------------------------------------------------------------------------------------------------------------------------------------------------------------------------|----|----|--|---|----|--|----|-----|
| H1-HA-153-266 | CPHAGAKSFYKNLIWLKKGNSYPKLSKSYINDKGKEVL<br>VLWGIHHPSTSADQQSLYQNADTYVFGSSRYSKFKFP<br>EIAIRPKVRDQEGRMNYWTLVEPGDKITFEATGNLV                                                                                    | 1  | 7  |  |   |    |  |    |     |
| H1-HA-153-281 | CPHAGAKSFYKNLIWLKKGNSYPKLSKSYINDKGKEVL<br>VLWGIHHPSTSADQQSLYQNADTYVFGSSRYSKFKFP<br>EIAIRPKVRDQEGRMNYWTLVEPGDKITFEATGNLVVP<br>RYAFAMERNAGSG                                                                 | 1  | 8  |  |   | 6  |  |    | 1   |
| H1-HA-154-249 | PHAGAKSFYKNLIWLKKGNSYPKLSKSYINDKGKEVL<br>LWGIHHPSTSADQQSLYQNADTYVFGSSRYSKFKFPEI<br>AIRPKVRDQEGRMNYWT                                                                                                       | 1  | 5  |  |   | 1  |  | 1  | 54  |
| H1-HA-181-281 | SYINDKGKEVLVLWGIHHPSTSADQQSLYQNADTYVFG<br>SSRYSKFKFPEIAIRPKVRDQEGRMNYWTLVEPGDKI<br>TFEATGNLVVPRYAFAMERNAGSG                                                                                                | 18 | 41 |  | 7 | 43 |  | 7  | 51  |
| H1-HA-182-220 | YINDKGKEVLVLWGIHHPSTSADQQSLYQNADTYVFG<br>S                                                                                                                                                                 |    | 4  |  | 3 | 18 |  | 1  | 219 |
| H1-HA-197-286 | HHPSTSADQQSLYQNADTYVFGSSRYSKFKFPEIAIRP<br>KVRDQEGRMNYWTLVEPGDKITFEATGNLVVPRYAF<br>AMERNAGSGIIISD                                                                                                           |    |    |  |   |    |  |    | 129 |
| H1-HA-202-357 | SADQQSLYQNADTYVFGSSRYSKFKFPEIAIRPKVRD<br>QEGRMNYWTLVEPGDKITFEATGNLVVPRYAFAMERN<br>AGSGIIISDTPVHDCNTTCQTPKGAINSLPFQNIHPITIG<br>KCPKYVKSTKLRLATGLRNIPSIQSRGLFGAIAAGFIEGG                                     |    |    |  |   |    |  | 1  | 7   |
| H1-HA-215-333 | YVFGSSRYSKFKFPEIAIRPKVRDQEGRMNYWTLVE<br>PGDKITFEATGNLVVPRYAFAMERNAGSGIIISDTPVHDC<br>NTTCQTPKGAINSLPFQNIHPITIGKCPKYVKSTKLRLAT                                                                               |    |    |  |   |    |  | 1  | 29  |
| H1-HA-235-281 | PKVRDQEGRMNYWTLVEPGDKITFEATGNLVVPRYAF<br>AMERNAGSG                                                                                                                                                         | 6  | 33 |  | 4 | 77 |  | 16 | 291 |
| H1-HA-239-335 | DQEGRMNYWTLVEPGDKITFEATGNLVVPRYAFAMER<br>NAGSGIIISDTPVHDCNTTCQTPKGAINSLPFQNIHPITI<br>GKCPKYVKSTKLRLATGL                                                                                                    | 7  | 29 |  | 2 | 26 |  | 10 | 167 |
| H1-HA-251-436 | VEPGDKITFEATGNLVVPRYAFAMERNAGSGIIISDTPVH<br>DCNTTCQTPKGAINSLPFQNIHPITIGKCPKYVKSTKLRL<br>LATGLRNIPSIQSRGLFGAIAAGFIEGGWTGMVDGWIGYH<br>HQNEQSGYAADLKSTQNAIDEITNKVNSVIEKMNTQFT<br>AVGKEFNHLEKRIENLNKKVDDGFLDIW | 5  | 24 |  |   |    |  |    |     |
| H1-HA-270-356 | YAFAMERNAGSGIIISDTPVHDCNTTCQTPKGAINSLPF<br>QNIHPITIGKCPKYVKSTKLRLATGLRNIPSIQSRGLFGAI<br>AGFIEG                                                                                                             |    |    |  | 1 |    |  |    |     |
| H1-HA-270-405 | YAFAMERNAGSGIIISDTPVHDCNTTCQTPKGAINSLPF<br>QNIHPITIGKCPKYVKSTKLRLATGLRNIPSIQSRGLFGAI<br>AGFIEGGWTGMVDGWYGYHHQNEQSGYAADLKSTQ<br>NAIDEITNKVNSVIEKMNT                                                         | 3  | 5  |  |   |    |  |    |     |



|               |                                                                                                                                                            |  |   |   |   |    |    |    |     |     |
|---------------|------------------------------------------------------------------------------------------------------------------------------------------------------------|--|---|---|---|----|----|----|-----|-----|
| HA2           |                                                                                                                                                            |  |   |   |   |    |    |    |     |     |
| H1-HA-335-351 | LRNIPSIQSRGLFGAIA                                                                                                                                          |  |   | 1 |   |    |    | 3  |     |     |
| H1-HA-337-405 | NIPSIQSRGLFGAIAAGFIEGGWTGMVDGWYGYHHQNEQ<br>GSGYAADLKSTQNAIDEITNKVNSVIEKMNT                                                                                 |  |   |   |   |    |    |    |     | 1   |
| H1-HA-341-356 | IQSRGLFGAIAAGFIEG                                                                                                                                          |  |   | 1 |   | 5  | 14 | 67 | 176 | 291 |
| H1-HA-341-455 | IQSRGLFGAIAAGFIEGGWTGMVDGWYGYHHQNEQGGSG<br>YAADLKSTQNAIDEITNKVNSVIEKMNTQFTAVGKEFNHL<br>EKRIENLNKKVDDGFLDIWTYNAELLVLENERLTDYH                               |  |   |   |   |    | 1  |    |     | 1   |
| H1-HA-344-380 | RGLFGAIAAGFIEGGWTGMVDGWYGYHHQNEQGGSGYA<br>A                                                                                                                |  |   | 3 |   | 6  | 17 | 2  | 39  | 42  |
| H1-HA-350-382 | IAGFIEGGWTGMVDGWYGYHHQNEQGGSGYAADL                                                                                                                         |  |   |   |   |    |    |    | 43  | 27  |
| H1-HA-351-421 | AGFIEGGWTGMVDGWYGYHHQNEQGGSGYAADLKSTQ<br>NAIDEITNKVNSVIEKMNTQFTAVGKEFNHLEKRI                                                                               |  |   | 2 | 1 | 2  | 5  | 2  | 19  | 14  |
| H1-HA-351-461 | AGFIEGGWTGMVDGWYGYHHQNEQGGSGYAADLKSTQ<br>NAIDEITNKVNSVIEKMNTQFTAVGKEFNHLEKRIENLNK<br>KVDDGFLDIWTYNAELLVLENERLTDYHDSNVKN                                    |  |   |   | 1 |    | 2  |    |     |     |
| H1-HA-359-385 | TGMVDGWYGYHHQNEQGGSGYAADLKST                                                                                                                               |  |   | 1 |   | 3  | 8  | 3  | 14  | 18  |
| H1-HA-360-411 | GMVDGWYGYHHQNEQGGSGYAADLKSTQNAIDEITNKV<br>NSVIEKMNTQFTAVG                                                                                                  |  |   |   |   |    |    | 1  | 29  | 42  |
| H1-HA-360-460 | GMVDGWYGYHHQNEQGGSGYAADLKSTQNAIDEITNKV<br>NSVIEKMNTQFTAVGKEFNHLEKRIENLNKKVDDGFLDI<br>WTYNAELLVLENERLTDYHDSNVK                                              |  |   | 1 |   | 2  | 1  | 1  | 7   | 4   |
| H1-HA-360-480 | GMVDGWYGYHHQNEQGGSGYAADLKSTQNAIDEITNKV<br>NSVIEKMNTQFTAVGKEFNHLEKRIENLNKKVDDGFLDI<br>WTYNAELLVLENERLTDYHDSNVKNLYEKVRSQKNN<br>AKEIGNG                       |  |   | 1 |   | 4  | 2  | 2  | 14  | 8   |
| H1-HA-362-506 | VDGWYGYHHQNEQGGSGYAADLKSTQNAIDEITNKVNS<br>VIEKMNTQFTAVGKEFNHLEKRIENLNKKVDDGFLDIW<br>TYNAELLVLENERLTDYHDSNVKNLYEKVRSQKNNAKE<br>IGNGCFEFYHKCDNTCMESVKNGTYPKY |  |   |   |   |    | 1  |    |     | 1   |
| H1-HA-366-422 | YGYHHQNEQGGSGYAADLKSTQNAIDEITNKVNSVIEKM<br>NTQFTAVGKEFNHLEKRIE                                                                                             |  | 1 | 3 |   | 15 | 22 | 3  | 23  | 31  |



|               |                                                                                                                                       |          |           |           |          |            |            |            |             |             |
|---------------|---------------------------------------------------------------------------------------------------------------------------------------|----------|-----------|-----------|----------|------------|------------|------------|-------------|-------------|
| H1-HA-368-489 | YHHQNEQSGSYAADLKSTQNAIDEITNKVNSVIEKMNTQFTAVGKEFNHLEKRIENLNKKVDDGFLDIWTYNAELLVLENERLTDYHDSNVKNLYEKVRSQKNNAKEIGNGCFEFYHKCD              |          |           |           |          | 3          | 2          | 1          | 13          | 5           |
| H1-HA-376-461 | SGYAADLKSTQNAIDEITNKVNSVIEKMNTQFTAVGKEFNHLEKRIENLNKKVDDGFLDIWTYNAELLVLENERLTDYHDSNVKN                                                 |          | 7         | 18        | 1        | 27         | 31         | 11         | 58          | 51          |
| H1-HA-380-520 | ADLKSTQATNKVNSVIEKMNTQFTAVGKEFNHLEKRIENLNKKVDDGFLDIWTYNAELLVLENERLTDYHDSNVKNLYEKVRSQKNNAKEIGNGCFEFYHKCDNTCMESVKNGTYPKYSEEAKLNREEIDGV  |          |           |           |          | 7          | 6          | 1          | 13          | 12          |
| H1-HA-386-522 | QNAIDEITNKVNSVIEKMNTQFTAVGKEFNHLEKRIENLNKKVDDGFLDIWTYNAELLVLENERLTDYHDSNVKNLYEKVRSQKNNAKEIGNGCFEFYHKCDNTCMESVKNGTYPKYSEEAKLNREEIDGVKL |          |           |           |          |            |            |            | 2           | 1           |
| H1-HA-394-489 | NKVNSVIEKMNTQFTAVGKEFNHLEKRIENLNKKVDDGFLDIWTYNAELLVLENERLTDYHDSNVKNLYEKVRSQKNNAKEIGNGCFEFYHKCD                                        |          |           | 4         | 1        | 43         | 59         | 24         | 233         | 245         |
| H1-HA-399-489 | VIEKMNTQFTAVGKEFNHLEKRIENLNKKVDDGFLDIWTYNAELLVLENERLTDYHDSNVKNLYEKVRSQKNNAKEIGNGCFEFYHKCDN                                            |          |           | 1         | 1        | 25         | 41         | 13         | 94          | 102         |
| H1-HA-410-489 | VGKEFNHLEKRIENLNKKVDDGFLDIWTYNAELLVLENERLTDYHDSNVKNLYEKVRSQKNNAKEIGNGCFEFYHKCD                                                        | 1        | 32        | 61        | 4        | 98         | 145        | 47         | 674         | 657         |
| H1-HA-410-523 | VGKEFNHLEKRIENLNKKVDDGFLDIWTYNAELLVLENERLTDYHDSNVKNLYEKVRSQKNNAKEIGNGCFEFYHKCDNTCMESVKNGTYPKYSEEAKLNREEIDGVKLE                        |          |           |           |          |            | 1          |            | 27          | 14          |
| H1-HA-411-473 | GKEFNHLEKRIENLNKKVDDGFLDIWTYNAELLVLENERLTDYHDSNVKNLYEKVRSQKNN                                                                         |          |           |           |          |            |            |            |             | 1           |
| H1-HA-436-531 | WTYNAELLVLENERLTDYHDSNVKNLYEKVRSQKNNAKEIGNGCFEFYHKCDNTCMESVKNGTYPKYSEEAKLNREEIDGVKLESTRIYQIL                                          |          |           |           |          |            |            |            | 2           | 1           |
| H1-HA-438-474 | YNAELLVLENERLTDYHDSNVKNLYEKVRSQKNN                                                                                                    |          |           | 2         |          |            | 6          | 2          | 43          | 51          |
| H1-HA-446-490 | LENERLTDYHDSNVKNLYEKVRSQKNNAKEIGNGCFEFYHKCDN                                                                                          |          | 1         |           |          | 2          | 1          | 2          | 35          | 39          |
| <b>Total</b>  |                                                                                                                                       | <b>1</b> | <b>41</b> | <b>99</b> | <b>9</b> | <b>242</b> | <b>368</b> | <b>182</b> | <b>1558</b> | <b>1659</b> |
